# Supplementary material
Source: Springer Nature journal article supplement (https://www.springermedizin.de/resource/supplementary/12876_2009_459_MOESM4_ESM.pdf/9437058)

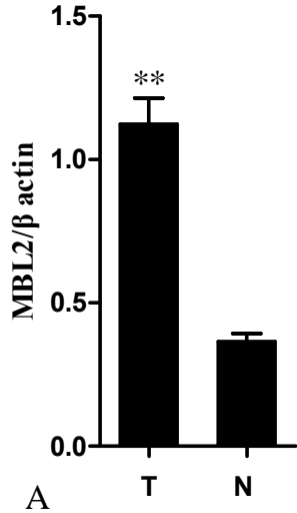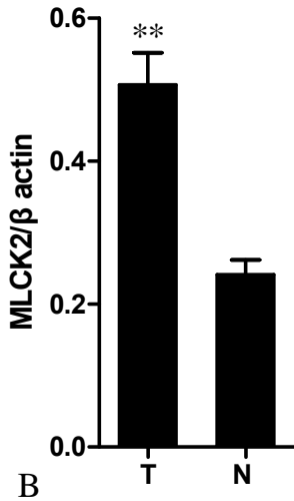

Supplement: MOESM4 [file 9437058]
